# Supplementary material for: Streptomyces umbrella toxin particles block hyphal growth of competing species
Source: PubMed Central journal article supplement (PMC11062931; doi:10.1038/s41586-024-07298-z), 2024-04-17
Supplement: 41586_2024_7298_MOESM1_ESM.pdf [file 41586_2024_7298_MOESM1_ESM.pdf]

---

**Supplementary information**

---

***Streptomyces* umbrella toxin particles block hyphal growth of competing species**

---

In the format provided by the  
authors and unedited

**Supplementary Information**

**Streptomyces umbrella toxin particles block hyphal growth of competing species**

Qinqin Zhao, Savannah Bertolli, Young-Jun Park, Yongjun Tan, Kevin J. Cutler, Pooja Srinivas, Kyle Asfahl, Citlali F. Garcia, Larry A. Gallagher, Yaqiao Li, Yaxi Wang, Devin Coleman-Derr, Frank DiMaio, Dapeng Zhang, S. Brook Peterson, David Veessler and Joseph D. Mougous

## Supplementary Figures

### Uncropped blots, Fig. 2c

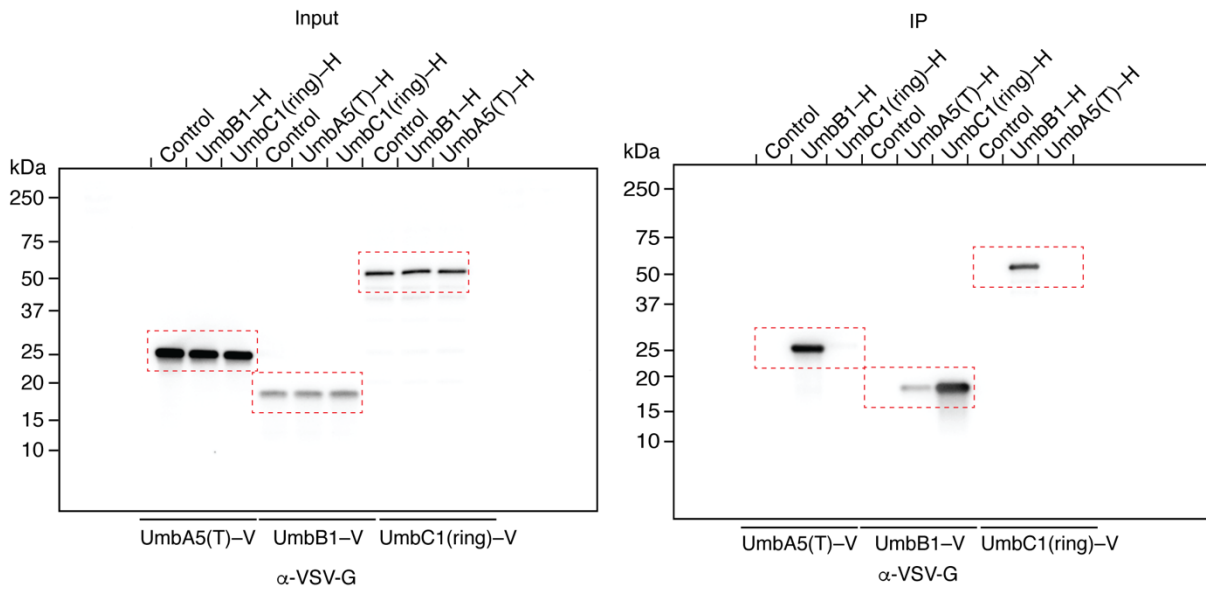

### Uncropped blots, Fig. 2d

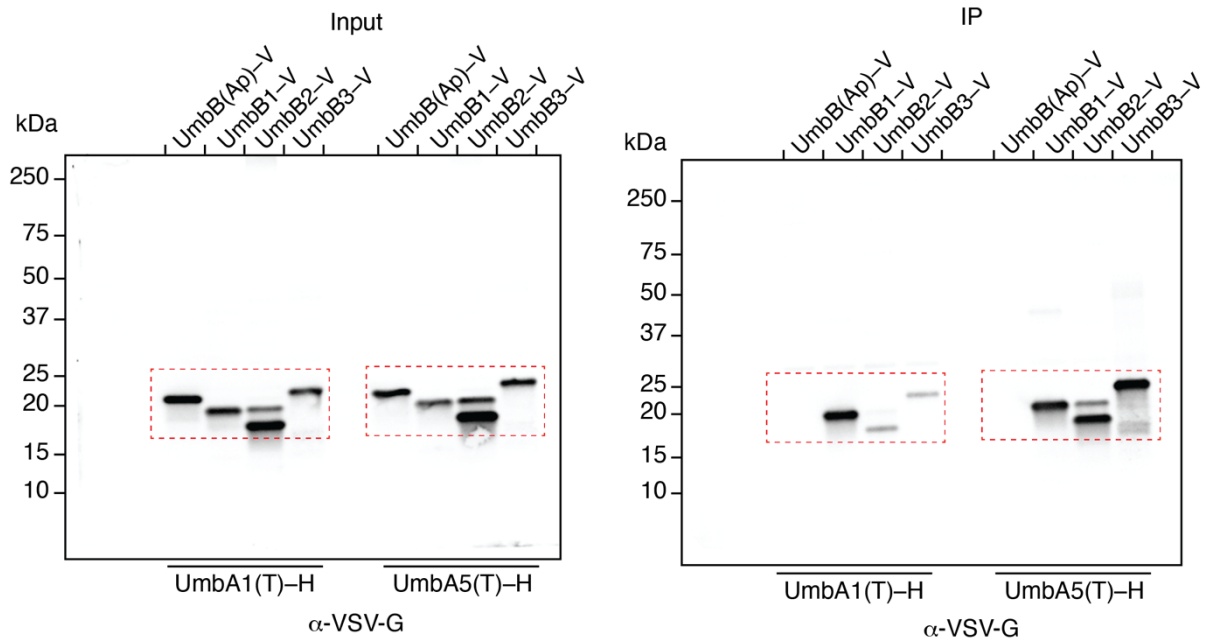

Uncropped blots, Fig. 2e

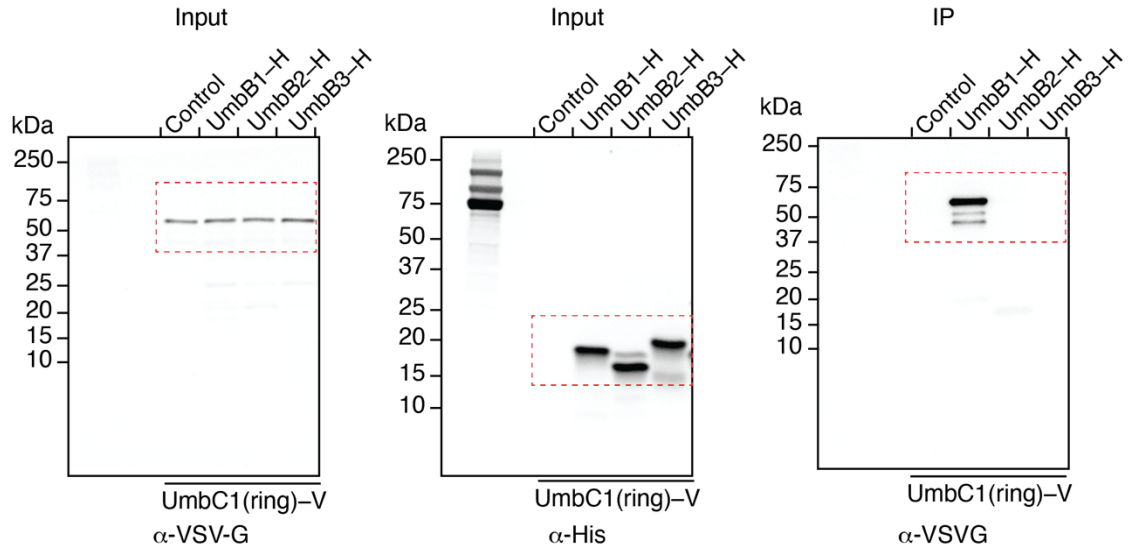

Uncropped blots, Fig. 2f

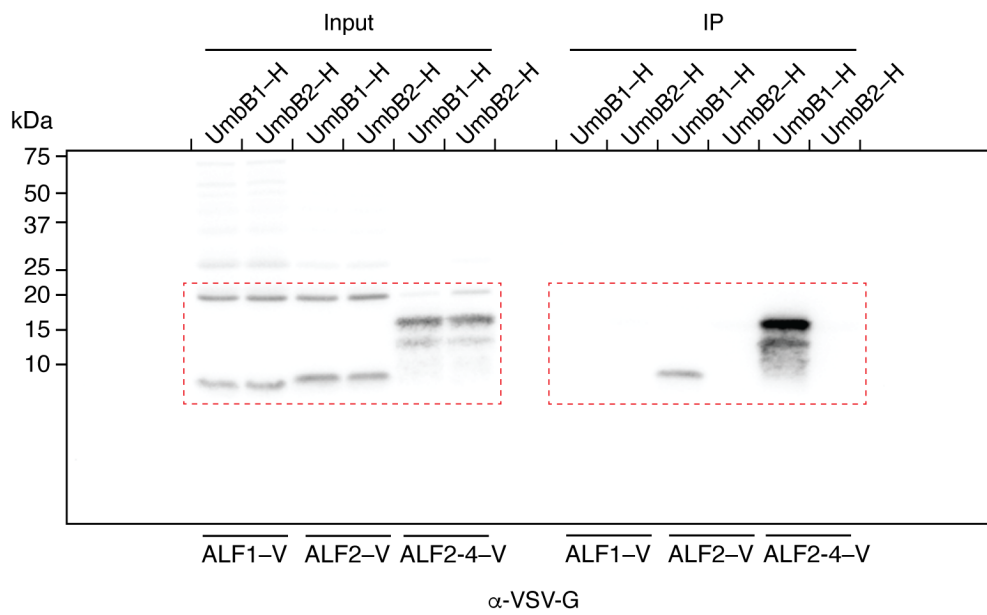

### Uncropped blots, Fig. 2j and 2k

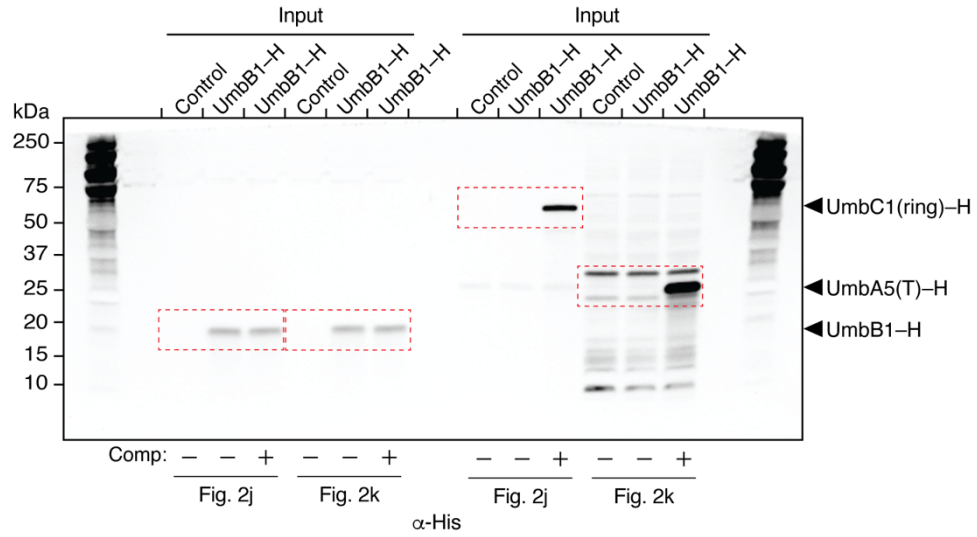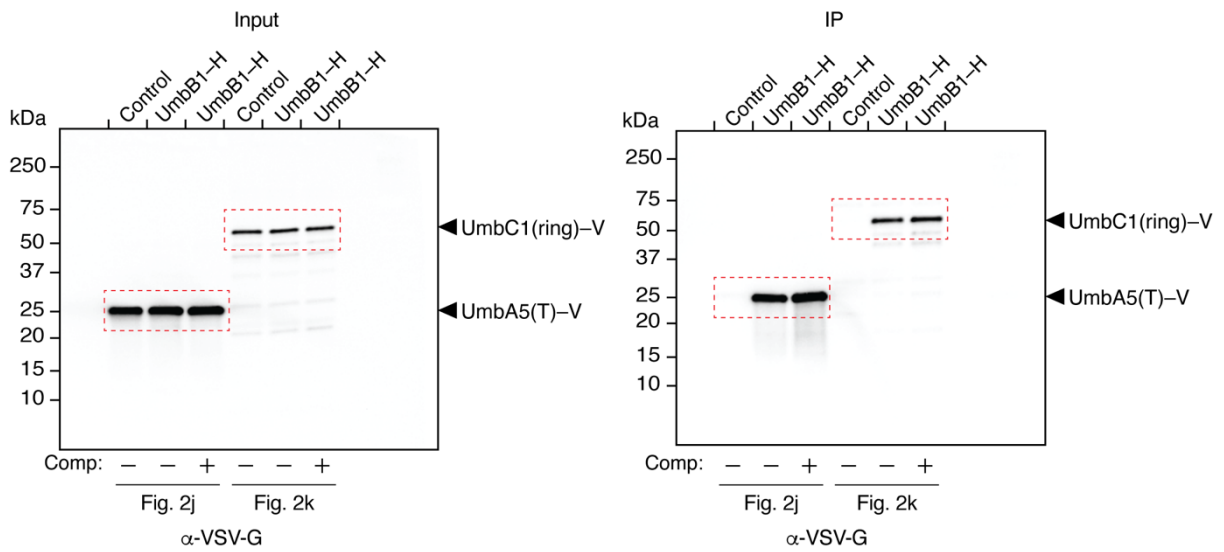

Uncropped gel, Fig. 3a

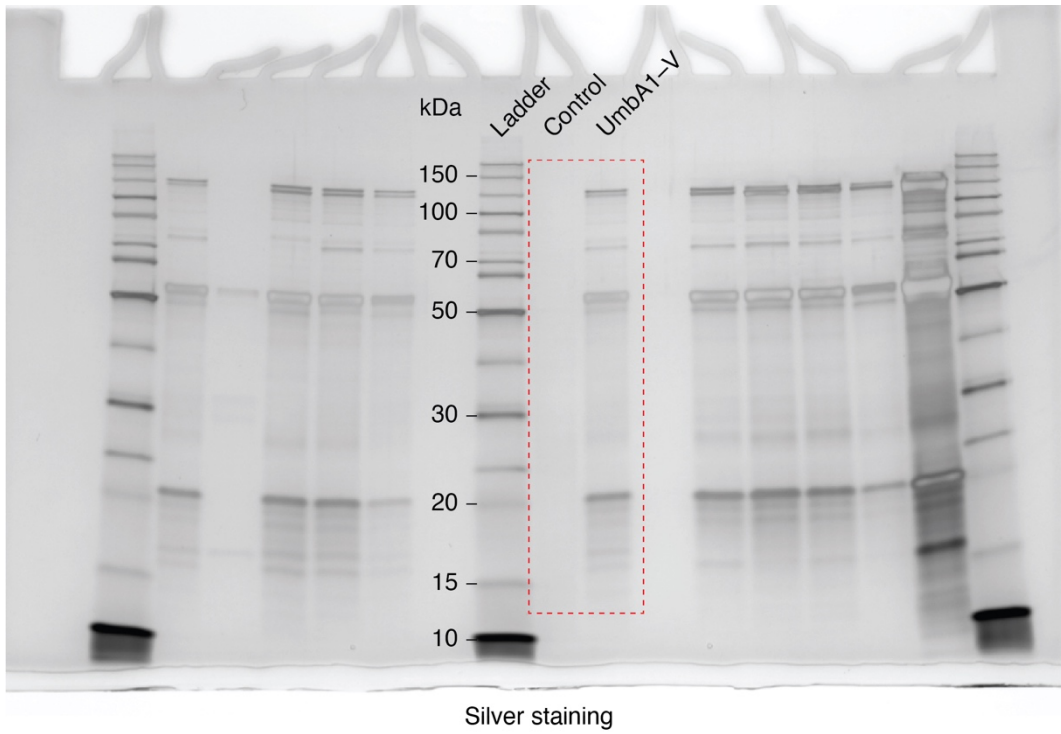

Uncropped blots, Fig. 3f

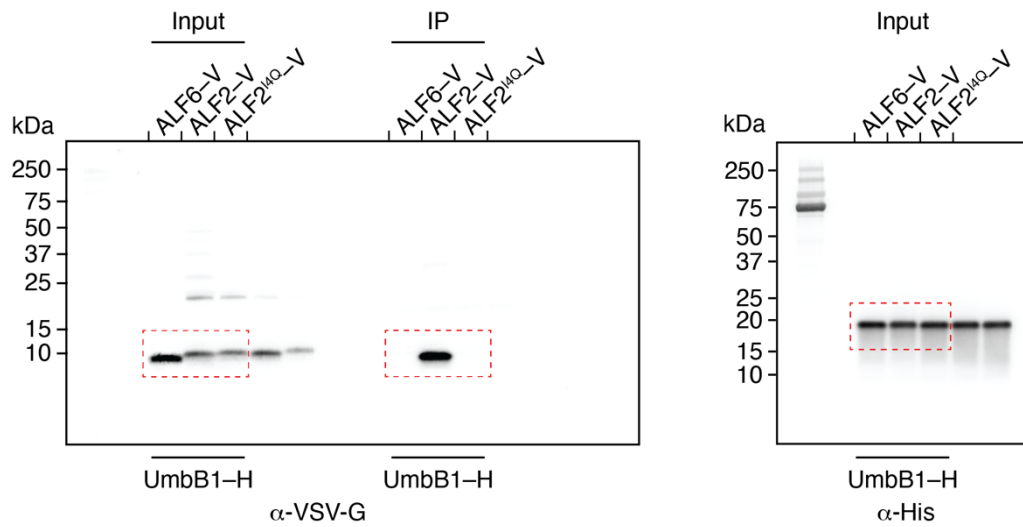

Uncropped blots, Extended Data Fig. 2

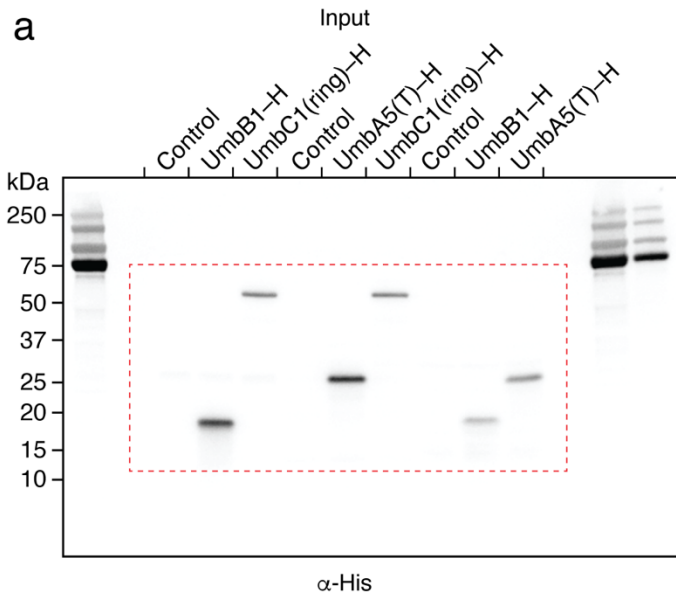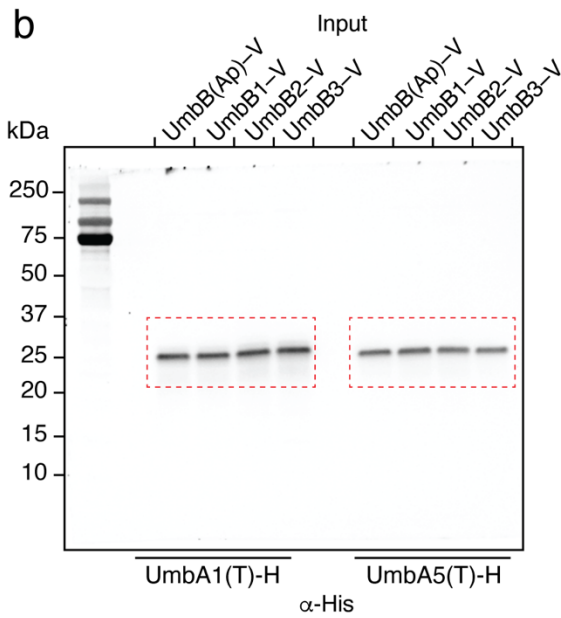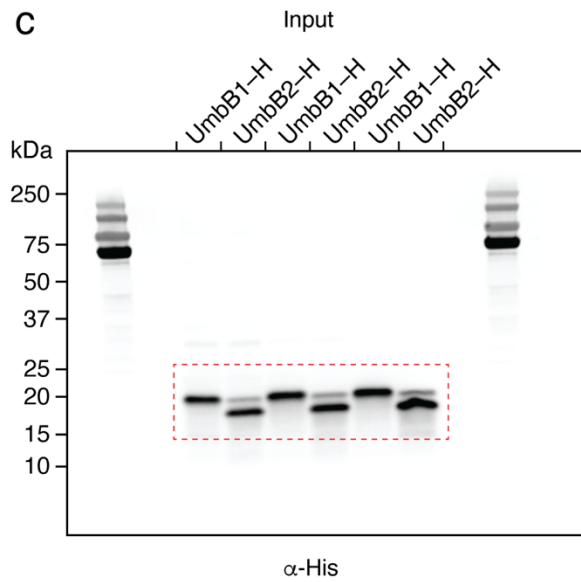

Uncropped blots, Extended Data Fig. 4a

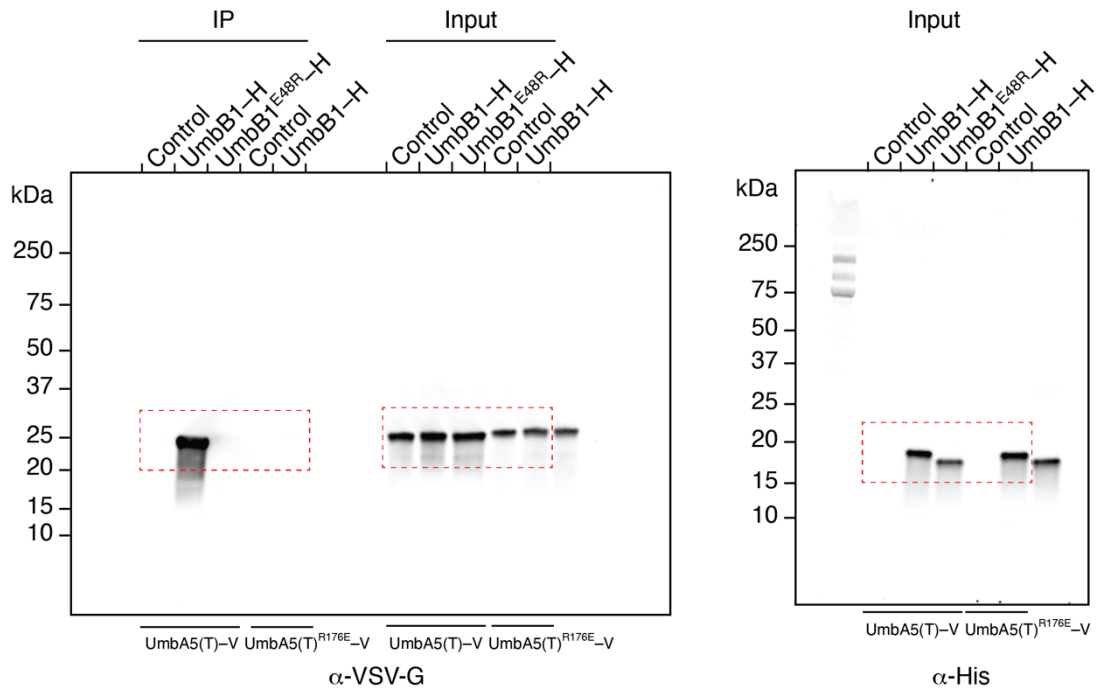

Uncropped gel, Extended Data Fig. 4c

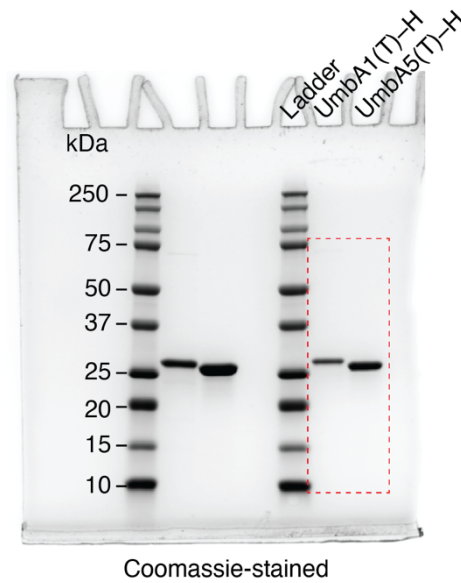



Uncropped gel, Extended Data Fig. 5b

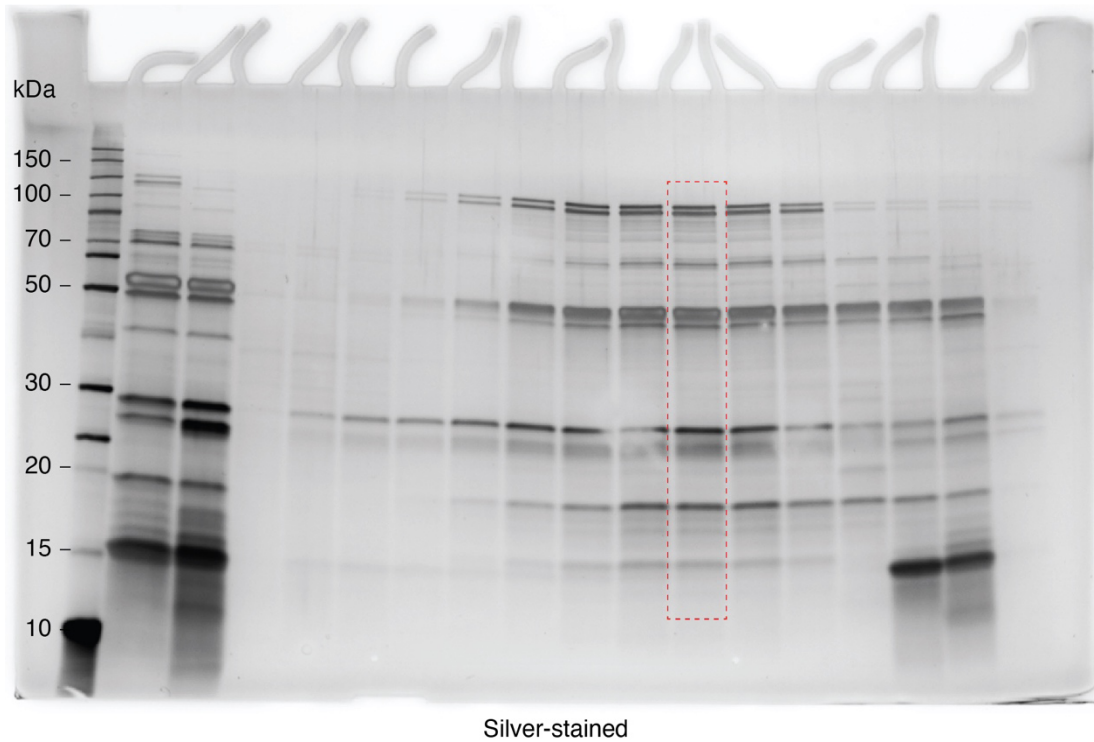

**Supplementary Fig. 1: Uncropped gels and blots for data shown in main body and Extended Data figures.** For each figure, the cropped regions are denoted by dashed boxes.

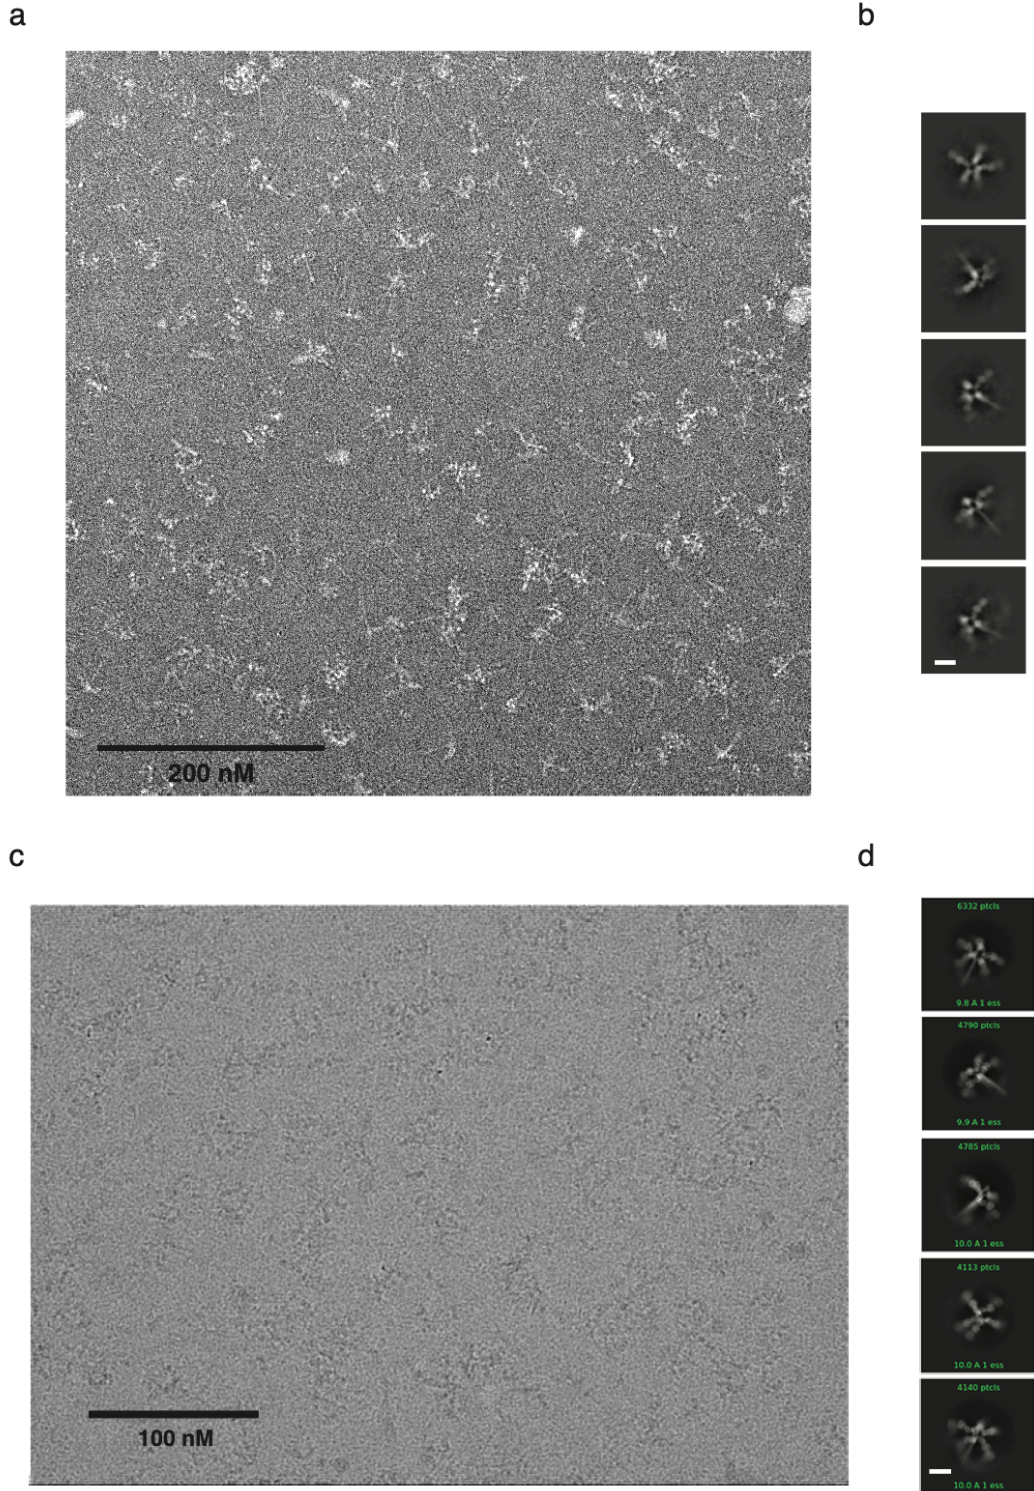

**Supplementary Fig. 2: Full fields of view and 2D class averages of Umb1 particles from negative stain electron microscopy and cryoEM. a, b,** Representative micrograph (a) and 2D class averages (b) from negative stain electron microscopy. Micrograph is representative of 230 collected. **c,d,** Representative micrograph (c) and 2D class averages (d) from cryo-EM data collection. Micrograph in (c) is representative of 22,917 collected. Ptcls, number of particles represented; ess, effective sample size. Scale bar in (b) and (d), 100 Å.

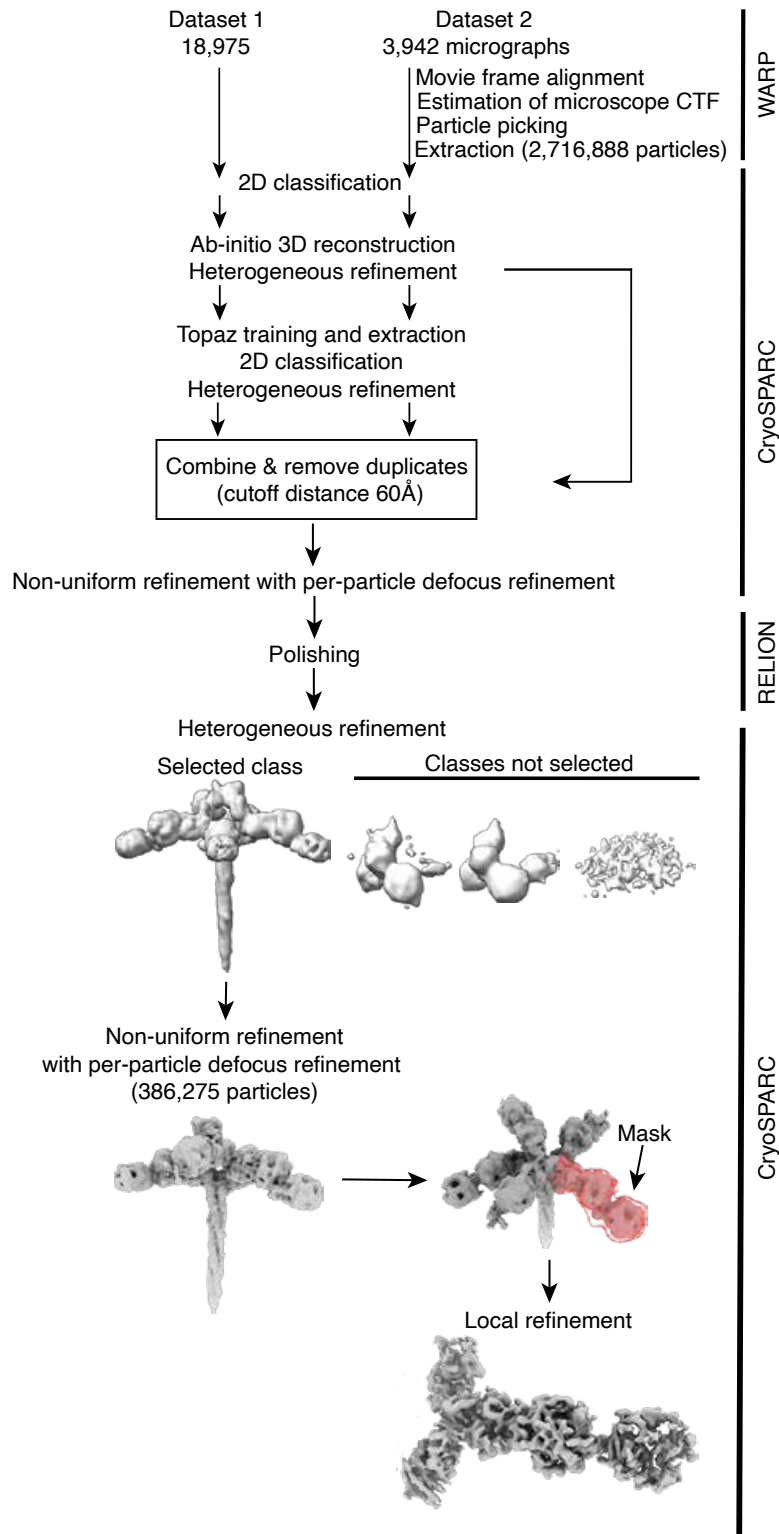

**Supplementary Fig. 3: CryoEM Workflow.** CryoEM data processing workflow for the Umb1 particle (details in methods section). CTF, contrast transfer function.

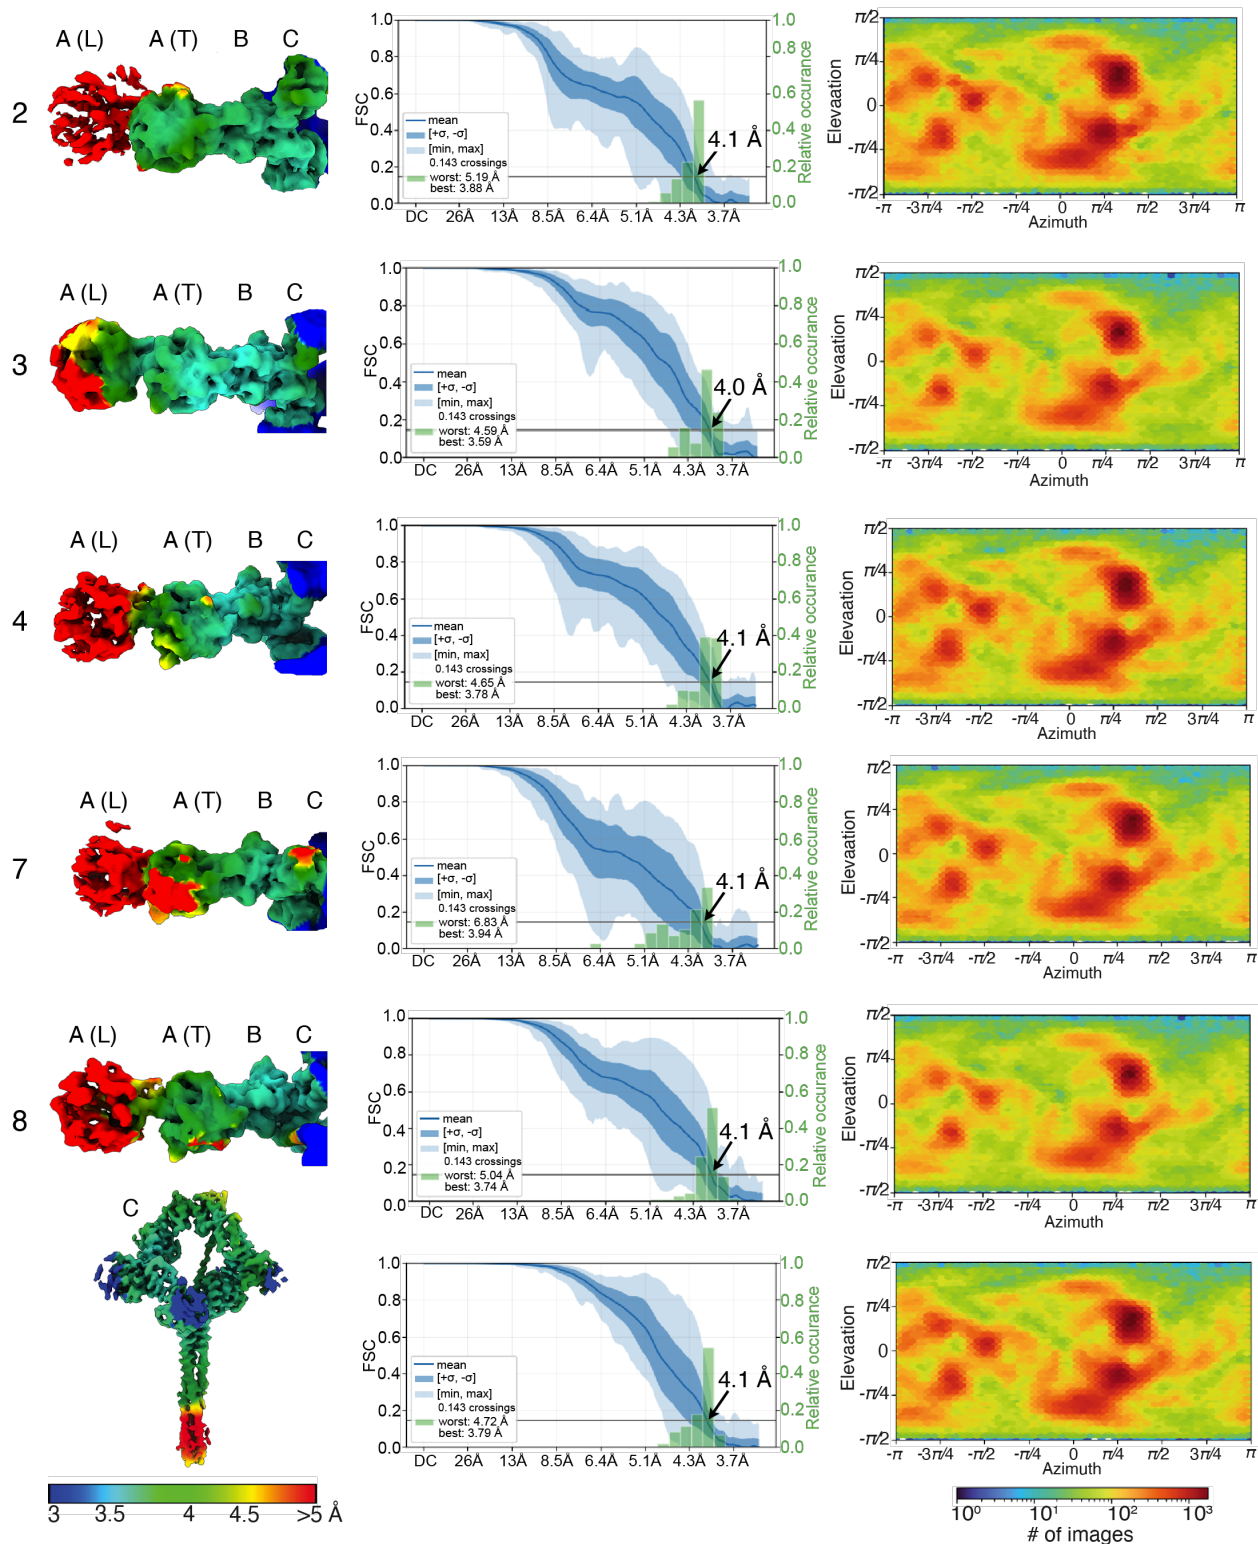

**Supplementary Fig. 4. CryoEM Validation for the Umb1 spokes and stalk.** Column 1: Local resolution maps of local refined maps encompassing each individual spoke, numbered to correspond with the interacting ALF repeat, and UmbC1. Column 2: FSC curves with the gold standard threshold of 0.143 and 3DFSC analysis for each spoke and UmbC1. Column 3: Particle distribution of local refined maps encompassing each spoke and UmbC1.

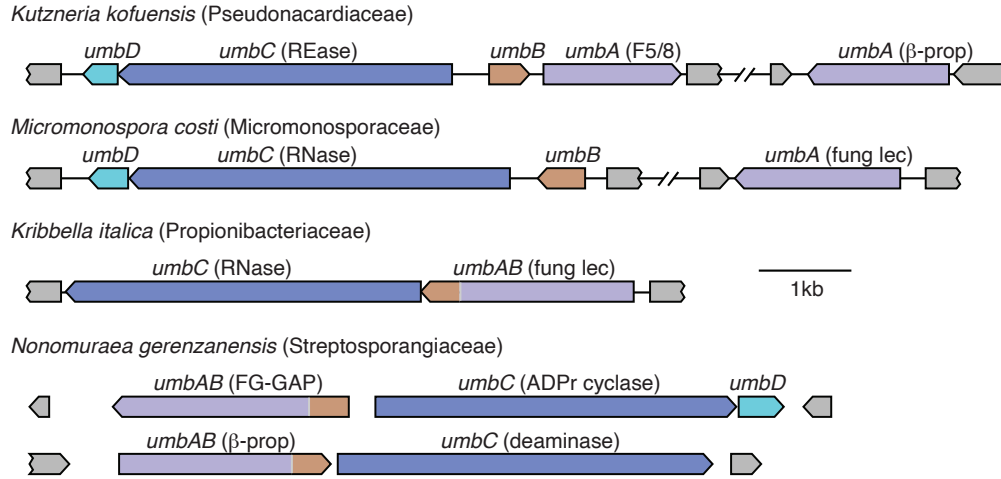

**Supplementary Fig. 5. Representative *umb* loci from phylogenetically diverse Actinobacteria.** Toxin domains encoded by the *umbC* genes and lectin domains encoded by the *umbA* genes are defined in Supplementary Tables 2 and 4, respectively.  $\beta$ -prop, UAL- $\beta$ prop-1 family identified in this study.

## Supplementary Tables.

### Supplementary Table 3: Mass spectrometry-based identification of proteins

**immunoprecipitated by UmbC1, UmbC2, UmbC3 and UmbA1.** Data were filtered to remove proteins with fewer than 6 spectral counts in the IP samples for both biological replicates, and only those proteins enriched at least  $\log_2 = 0.5$  are shown, with the exception of UmbA-VSV-G, for which the most-enriched non-Umb protein was included for context.

| Bait protein       | Protein ID    | Control | IP    | Enrichment (log2) |
|--------------------|---------------|---------|-------|-------------------|
| <b>UmbC1-VSV-G</b> |               |         |       |                   |
|                    | UmbA4         | 0       | 49    | n/a               |
|                    | UmbA5         | 0       | 40    | n/a               |
|                    | UmbD1         | 0       | 28.5  | n/a               |
|                    | UmbB1         | 0.5     | 18.5  | n/a               |
|                    | UmbA6         | 0       | 17    | n/a               |
|                    | UmbC1         | 1.5     | 134.5 | 6.02              |
|                    | UmbA1         | 6.5     | 53    | 2.91              |
|                    | Q8CJQ6        | 2       | 6.5   | 0.67              |
|                    | Q8CK05        | 6.5     | 15.5  | 0.73              |
| <b>UmbC2-VSV-G</b> |               |         |       |                   |
|                    | UmbC2         | 0.5     | 46.5  | n/a               |
|                    | UmbA4         | 0       | 12    | n/a               |
|                    | Q9L0Y3        | 1       | 11.5  | n/a               |
|                    | UmbA5         | 0.5     | 11    | n/a               |
|                    | UmbB2         | 0       | 9.5   | n/a               |
|                    | Q9KXP9        | 1.5     | 9.5   | n/a               |
|                    | UmbC1         | 0.5     | 7.5   | n/a               |
|                    | O54158        | 0.5     | 7     | n/a               |
|                    | UmbA1         | 1       | 15.5  | 3.61              |
|                    | Q9RNU9        | 2.5     | 10.5  | 2.31              |
|                    | Q9S274        | 1.5     | 8.5   | 2.22              |
|                    | Q9XAC1        | 2       | 8     | 1.92              |
|                    | Q9XA42        | 2       | 7     | 1.80              |
|                    | Q9Z578        | 1.5     | 6     | 1.78              |
|                    | O69998        | 3       | 6     | 1.40              |
|                    | Q9FBR4        | 9.5     | 16.5  | 1.32              |
|                    | UmbA1         | 4       | 11    | 1.25              |
|                    | Q9RK35        | 3.5     | 9.5   | 1.25              |
|                    | Q9KZP4        | 2.5     | 7.5   | 1.24              |
|                    | Q9S2Q3 Q9FC62 | 6.5     | 13.5  | 1.10              |
|                    | Q9L1Z5        | 3.5     | 8     | 1.08              |

|                    |      |       |      |
|--------------------|------|-------|------|
| Q9XAP2             | 2.5  | 6.5   | 1.08 |
| Q9FC43             | 4    | 10    | 1.03 |
| Q9S2Q5 Q9FC63      | 6    | 9.5   | 1.01 |
| Q9XA23             | 5    | 7     | 1.01 |
| Q7AKF3             | 8.5  | 15.5  | 0.98 |
| Q9XAD1             | 7.5  | 18    | 0.94 |
| Q9KXR6             | 8    | 15.5  | 0.93 |
| Q9ZBU0             | 3.5  | 6.5   | 0.81 |
| Q9Z564             | 6    | 13    | 0.76 |
| Q9X909             | 8.5  | 14    | 0.67 |
| Q9ADJ6             | 3.5  | 6     | 0.66 |
| Q9EWW4             | 4.5  | 9     | 0.66 |
| Q9RKK5             | 8    | 16    | 0.62 |
| Q9L2H9             | 7.5  | 11    | 0.61 |
| Q93RV9             | 4    | 7.5   | 0.60 |
| <b>UmbC3-VSV-G</b> |      |       |      |
| UmbA3              | 0.5  | 61.5  | n/a  |
| UmbA4              | 0    | 45    | n/a  |
| UmbB3              | 0    | 32    | n/a  |
| UmbA6              | 0.5  | 26.5  | n/a  |
| UmbA2              | 0    | 9     | n/a  |
| UmbC3              | 10.5 | 781   | 4.71 |
| UmbA5              | 2    | 62    | 3.79 |
| UmbC1              | 1    | 9.5   | 1.70 |
| O70007             | 1.5  | 9.5   | 1.30 |
| Q9L244             | 2.5  | 8.5   | 0.92 |
| <b>UmbA1-VSV-G</b> |      |       |      |
| UmbA4              | 0    | 51.5  | n/a  |
| UmbA5              | 0    | 49.5  | n/a  |
| UmbB1              | 0.5  | 38.5  | n/a  |
| UmbA6              | 0    | 26    | n/a  |
| UmbB2              | 0    | 11.5  | n/a  |
| UmbC1              | 1.5  | 147.5 | 5.99 |
| UmbA1              | 6.5  | 145   | 4.41 |
| Q9X8D4             | 5    | 8.5   | 0.23 |

**Supplementary Table 5: Growth conditions for and results from screening Umb supernatant for growth inhibitory activity against diverse bacteria.** Growth was measured at a single timepoint using an ATP quantification-based bacterial cell viability assay. The average ratio (log 2) represents the viability of each strain grown with control supernatant divided by Umb supernatant treatment in two biological replicates of the screen. Z-scores were calculated from the average of log 2-transformed ratios from across all strains screened.

| Phylum         | Genus and species                                  | Source           | Media | Average ratio (log 2) | Z-score |
|----------------|----------------------------------------------------|------------------|-------|-----------------------|---------|
| Actinomycetota | <i>Allokutzneria albata</i>                        | NRRL No. B-24461 | ISP2  | 0.281                 | 0.296   |
| Actinomycetota | <i>Amycolatopsis kentuckyensis</i><br>SAI_225      | This study       | TSBY  | -1.175                | -0.566  |
| Actinomycetota | <i>Amycolatopsis</i> sp. SAI_101                   | This study       | TSBY  | 1.060                 | 0.757   |
| Actinomycetota | <i>Arthrobacter nitroguajacolicus</i><br>SAI_060   | This study       | TSBY  | -0.584                | -0.217  |
| Actinomycetota | <i>Arthrobacter oxydans</i> SAI_217                | This study       | TSBY  | -0.956                | -0.436  |
| Actinomycetota | <i>Brevibacterium lyticum</i>                      | NRRL No. B-4262  | TGY   | -0.356                | -0.081  |
| Actinomycetota | <i>Catenulispora acidophila</i>                    | NRRL No. B-24433 | ISP2  | -0.359                | -0.083  |
| Actinomycetota | <i>Cellulosimicrobium cellulans</i>                | NRRL No. B-2381  | TGY   | -0.990                | -0.457  |
| Actinomycetota | <i>Cellulosimicrobium cellulans</i><br>SAI_258     | This study       | TSBY  | -1.093                | -0.517  |
| Actinomycetota | <i>Cellulosimicrobium</i> sp. SAI_197              | This study       | TSBY  | -1.254                | -0.613  |
| Actinomycetota | <i>Dermacoccus</i> sp. SAI_028                     | This study       | TSBY  | 0.289                 | 0.301   |
| Actinomycetota | <i>Dermatophilus congolensis</i>                   | NRRL No. B-2350  | TSBY  | -1.626                | -0.833  |
| Actinomycetota | <i>Frankia</i> sp.                                 | NRRL No. B-16219 | ISP2  | 0.390                 | 0.360   |
| Actinomycetota | <i>Georgenia</i> sp.                               | NRRL No. B-59275 | TGY   | -1.048                | -0.491  |
| Actinomycetota | <i>Glycomyces rutgersensis</i>                     | NRRL No. B-16106 | ISP2  | -2.024                | -1.069  |
| Actinomycetota | <i>Kibdelosporangium aridum</i>                    | NRRL No. B-16436 | ISP2  | 0.135                 | 0.210   |
| Actinomycetota | <i>Kineococcus gynurae</i>                         | NRRL No. B-24568 | ISP2  | -2.100                | -1.114  |
| Actinomycetota | <i>Kitasatospora kifunensis</i>                    | NRRL No. B-24284 | LB    | 2.144                 | 1.399   |
| Actinomycetota | <i>Kribbella hippodromi</i>                        | NRRL No. B-24553 | ISP2  | -0.226                | -0.004  |
| Actinomycetota | <i>Leifsonia</i> sp. 004_C5                        | This study       | TSBY  | 0.491                 | 0.420   |
| Actinomycetota | <i>Leifsonia</i> sp. 006_B1                        | This study       | TSBY  | -0.166                | 0.031   |
| Actinomycetota | <i>Microbacterium atlanticum</i><br>SAI_030        | This study       | TSBY  | -0.333                | -0.067  |
| Actinomycetota | <i>Microbacterium jejuense</i> SAI_031             | This study       | TSBY  | -2.428                | -1.308  |
| Actinomycetota | <i>Microbacterium paraoxydans</i><br>SAI_221       | This study       | TSBY  | -1.434                | -0.720  |
| Actinomycetota | <i>Microbacterium trichothecenolyticum</i> CFG_272 | This study       | TSBY  | -0.706                | -0.288  |
| Actinomycetota | <i>Microtetraspora glauca</i>                      | NRRL No. B-3735  | ISP2  | -0.026                | 0.114   |
| Actinomycetota | <i>Mycobacterium goodii</i> 002_G6                 | This study       | TSBY  | 0.985                 | 0.713   |
| Actinomycetota | <i>Mycobacterium smegmatis</i> 001_A6              | This study       | TSBY  | -1.658                | -0.852  |
| Actinomycetota | <i>Nocardioides luteus</i>                         | NRRL No. B-16231 | R2A   | 0.313                 | 0.315   |



|                |                                                    |                  |      |        |        |
|----------------|----------------------------------------------------|------------------|------|--------|--------|
| Actinomycetota | <i>Nocardioides sp.</i> HB12                       | PMID:29556109    | R2A  | -0.228 | -0.006 |
| Actinomycetota | <i>Nocardioides sp.</i> SAI_065                    | This study       | TSBY | -0.419 | -0.119 |
| Actinomycetota | <i>Oerskovia turbata</i>                           | NRRL No. B-8019  | ISP2 | -0.001 | 0.129  |
| Actinomycetota | <i>Patulibacter minatonensis</i>                   | NRRL No. B-24346 | ISP2 | -0.799 | -0.343 |
| Actinomycetota | <i>Promicromonospora kroppenstedtii</i><br>TBS_116 | This study       | TSBY | 0.188  | 0.241  |
| Actinomycetota | <i>S. albogriseolus</i> SAI_173                    | This study       | TSBY | 0.705  | 0.547  |
| Actinomycetota | <i>S. albogriseolus</i> SAI_190                    | This study       | TSBY | -0.210 | 0.005  |
| Actinomycetota | <i>S. ambofaciens</i>                              | NRRL No. B-2516  | TSBY | -0.633 | -0.245 |
| Actinomycetota | <i>S. ambofaciens</i> SAI_080                      | This study       | TSBY | 8.434  | 5.124  |
| Actinomycetota | <i>S. ambofaciens</i> SAI_104                      | This study       | TSBY | 3.839  | 2.403  |
| Actinomycetota | <i>S. ambofaciens</i> SAI_108                      | This study       | TSBY | -1.135 | -0.542 |
| Actinomycetota | <i>S. ambofaciens</i> SAI_195                      | This study       | TSBY | 10.827 | 6.541  |
| Actinomycetota | <i>S. antibioticus</i>                             | NRRL No. B-1701  | TSBY | -1.104 | -0.524 |
| Actinomycetota | <i>S. anulatus</i>                                 | NRRL No. B-2000  | TSBY | -0.114 | 0.062  |
| Actinomycetota | <i>S. azureus</i>                                  | NRRL No. B-2655  | TSBY | -0.187 | 0.019  |
| Actinomycetota | <i>S. cellulosa</i> SAI_051                        | This study       | TSBY | -0.683 | -0.275 |
| Actinomycetota | <i>S. coelicolor</i>                               | NRRL No. B-3062  | TSBY | -0.171 | 0.029  |
| Actinomycetota | <i>S. collinus</i> SAI_078                         | This study       | TSBY | 3.028  | 1.923  |
| Actinomycetota | <i>S. corchorusii</i> SAI_180                      | This study       | TSBY | 0.344  | 0.333  |
| Actinomycetota | <i>S. eurocidicus</i>                              | NRRL No. B-1701  | TSBY | 0.286  | 0.299  |
| Actinomycetota | <i>S. graminofaciens</i> SAI_110                   | This study       | TSBY | -0.130 | 0.052  |
| Actinomycetota | <i>S. graminofaciens</i> SAI_175                   | This study       | TSBY | -0.331 | -0.067 |
| Actinomycetota | <i>S. graminofaciens</i> SAI_211                   | This study       | TSBY | 0.091  | 0.184  |
| Actinomycetota | <i>S. griseorubiginosus</i> SAI_142                | This study       | TSBY | -0.212 | 0.004  |
| Actinomycetota | <i>S. griseus</i>                                  | NRRL No. B-2682  | TSBY | 4.665  | 2.892  |
| Actinomycetota | <i>S. lividans</i>                                 | NRRL No. B65306  | TSBY | -0.045 | 0.103  |
| Actinomycetota | <i>S. luteogriseus</i>                             | NRRL No. B-12422 | TSBY | 2.698  | 1.727  |
| Actinomycetota | <i>S. mobaraensis</i>                              | NRRL No. B-3729  | TSBY | 0.358  | 0.342  |
| Actinomycetota | <i>S. pristinaespiralis</i>                        | NRRL No. B2958   | TSBY | -0.010 | 0.124  |
| Actinomycetota | <i>S. pristinaespiralis</i> SAI_178                | This study       | TSBY | -0.662 | -0.263 |
| Actinomycetota | <i>S. rochei</i> SAI_164                           | This study       | TSBY | 2.083  | 1.363  |
| Actinomycetota | <i>S. sp.</i> SAI_041                              | This study       | TSBY | -0.573 | -0.210 |
| Actinomycetota | <i>S. sp.</i> SAI_103                              | This study       | TSBY | 2.574  | 1.654  |
| Actinomycetota | <i>S. sp.</i> SAI_117                              | This study       | TSBY | -0.264 | -0.027 |
| Actinomycetota | <i>S. sp.</i> SAI_126                              | This study       | TSBY | -0.238 | -0.011 |
| Actinomycetota | <i>S. sp.</i> SAI_133                              | This study       | TSBY | -0.074 | 0.085  |
| Actinomycetota | <i>S. sp.</i> SAI_167                              | This study       | TSBY | 1.935  | 1.275  |
| Actinomycetota | <i>S. sp.</i> SAI_203                              | This study       | TSBY | -0.343 | -0.074 |

|                |                                        |                              |                        |        |        |
|----------------|----------------------------------------|------------------------------|------------------------|--------|--------|
| Actinomycetota | <i>S. tendae</i> SAI_182               | This study                   | TSBY                   | -1.268 | -0.621 |
| Actinomycetota | <i>S. tendae</i> SAI_185               | This study                   | TSBY                   | -0.274 | -0.033 |
| Actinomycetota | <i>S. tendae</i> SAI_218               | This study                   | TSBY                   | -0.306 | -0.051 |
| Actinomycetota | <i>Saccharothrix coeruleofusca</i>     | NRRL No. B-16115             | LB                     | 2.528  | 1.626  |
| Actinomycetota | <i>Sanguibacter sp.</i>                | NRRL No. B-59339             | TGY                    | -0.769 | -0.326 |
| Actinomycetota | <i>Terrabacter tumescens</i>           | NRRL No. B-4012              | TGY                    | -0.997 | -0.461 |
| Bacteroidota   | <i>Chryseobacterium bacterium</i> CI02 | PMID:16885294                | TSBY                   | -0.591 | -0.220 |
| Bacteroidota   | <i>Flavobacterium johnsoniae</i> UW101 | Gift from Mark McBride's lab | LB                     | -0.328 | -0.065 |
| Bacteroidota   | <i>Sphingobacterium bacterium</i> CI01 | PMID:16885294                | TSBY                   | -0.409 | -0.112 |
| Firmicutes     | <i>Alkalihalobacillus alcalophilus</i> | NRRL No. B-14309             | Alkaline Nutrient Agar | 0.005  | 0.132  |
| Firmicutes     | <i>Bacillus aryabhatai</i> TBS_067     | This study                   | TSBY                   | -1.011 | -0.469 |
| Firmicutes     | <i>Bacillus haynesii</i> TBS_113       | This study                   | TSBY                   | -0.821 | -0.356 |
| Firmicutes     | <i>Bacillus megaterium</i> 005_H9      | This study                   | TSBY                   | -0.725 | -0.300 |
| Firmicutes     | <i>Bacillus pumilus</i> TBS_051        | This study                   | TSBY                   | -0.994 | -0.459 |
| Firmicutes     | <i>Bacillus pumilus</i> TBS_099        | This study                   | TSBY                   | -0.873 | -0.388 |
| Firmicutes     | <i>Bacillus sp.</i> 005_H12            | This study                   | TSBY                   | -0.887 | -0.396 |
| Firmicutes     | <i>Bacillus sp.</i> 006_D12            | This study                   | TSBY                   | -1.045 | -0.489 |
| Firmicutes     | <i>Bacillus subtilis</i> 004_F4        | This study                   | TSBY                   | -0.655 | -0.258 |
| Firmicutes     | <i>Bacillus subtilis</i> 006_C4        | This study                   | TSBY                   | -0.998 | -0.462 |
| Firmicutes     | <i>Bacillus velezensis</i> 006_A12     | This study                   | TSBY                   | -0.598 | -0.224 |
| Firmicutes     | <i>Bacillus zanthoxyli</i> TBS_040     | This study                   | TSBY                   | 1.018  | 0.732  |
| Firmicutes     | <i>Bacillus zanthoxyli</i> TBS_056     | This study                   | TSBY                   | -0.804 | -0.346 |
| Firmicutes     | <i>Brevibacillus borstelensis</i>      | NRRL No. NRS-948             | TGY                    | -1.339 | -0.663 |
| Firmicutes     | <i>Brevibacillus chosinensis</i>       | NRRL No. B-23247             | TGY                    | -0.923 | -0.417 |
| Firmicutes     | <i>Brevibacillus laterosporus</i>      | NRRL No. NRS-1339            | TGY                    | -1.317 | -0.650 |
| Firmicutes     | <i>Brevibacillus parabravis</i>        | NRRL No. NRS-751             | TGY                    | -1.124 | -0.536 |
| Firmicutes     | <i>Carnobacterium divergens</i>        | NRRL No. B-23835             | Liver Infusion Broth   | -0.850 | -0.374 |
| Firmicutes     | <i>Carnobacterium gallinarum</i>       | NRRL No. B-14832             | Liver Infusion Broth   | -1.293 | -0.636 |
| Firmicutes     | <i>Carnobacterium maltaromaticum</i>   | NRRL No. B-14829             | Liver Infusion Broth   | -1.441 | -0.724 |
| Firmicutes     | <i>Caryophanon latum</i>               | NRRL No. B-1893              | ISP2                   | -0.878 | -0.390 |
| Firmicutes     | <i>Cytobacillus kochii</i>             | NRRL No. NRS-1758            | TGY                    | -1.578 | -0.805 |
| Firmicutes     | <i>Cytobacillus praedii</i>            | NRRL No. B-14566             | TGY                    | -1.151 | -0.552 |
| Firmicutes     | <i>Fictibacillus marinisediminis</i>   | NRRL No. B-59209             | TGY                    | 0.091  | 0.184  |
| Firmicutes     | <i>Gracibacillus dipsosauri</i>        | NRRL No. B-23348             | TSBY                   | -0.765 | -0.323 |
| Firmicutes     | <i>Heyndrickxia sporothermodurnas</i>  | NRRL No. NRS-1638            | TGY                    | -0.872 | -0.387 |
| Firmicutes     | <i>Kurthia gibsonii</i>                | NRRL No. B-41085             | TGY                    | -2.253 | -1.205 |
| Firmicutes     | <i>Kurthia sibirica</i>                | NRRL No. B-41083             | TGY                    | -0.691 | -0.279 |

|                |                                        |                                                 |                        |        |        |
|----------------|----------------------------------------|-------------------------------------------------|------------------------|--------|--------|
| Firmicutes     | <i>Lactococcus lactis</i>              | NRRL No. B-23804                                | Liver Infusion Broth   | -1.762 | -0.914 |
| Firmicutes     | <i>Leuconostoc citreum</i>             | NRRL No. B-1501                                 | Liver Infusion Broth   | -1.138 | -0.544 |
| Firmicutes     | <i>Lysinibacillus fusiformis</i>       | NRRL No. B-14865                                | TGY                    | -1.121 | -0.534 |
| Firmicutes     | <i>Lysinibacillus xylanityticus</i>    | NRRL No. NRS-1307                               | TGY                    | -1.037 | -0.485 |
| Firmicutes     | <i>Neobacillus mesonae</i>             | NRRL No. B-14565                                | TGY                    | -0.760 | -0.320 |
| Firmicutes     | <i>Oenococcus oeni</i>                 | NRRL No. B-3474                                 | Liver Infusion Broth   | -0.961 | -0.439 |
| Firmicutes     | <i>Paenibacillus alba</i>              | NRRL No. BD-533                                 | TGY                    | -0.155 | 0.038  |
| Firmicutes     | <i>Paenibacillus amylolyticus</i>      | NRRL No. B-14940                                | TGY                    | 0.342  | 0.332  |
| Firmicutes     | <i>Paenibacillus chibensis</i>         | NRRL No. B-142                                  | TGY                    | -1.367 | -0.680 |
| Firmicutes     | <i>Paenibacillus favisporus</i> 004_C2 | This study                                      | TSBY                   | -0.740 | -0.308 |
| Firmicutes     | <i>Paenibacillus lautus</i> 004_C1     | This study                                      | TSBY                   | -0.816 | -0.354 |
| Firmicutes     | <i>Paenibacillus lautus</i> TBS_091    | This study                                      | TSBY                   | 0.067  | 0.169  |
| Firmicutes     | <i>Paenibacillus lautus</i> TBS_092    | This study                                      | TSBY                   | -2.070 | -1.096 |
| Firmicutes     | <i>Pediococcus pentosaceus</i>         | NRRL No. B-14620                                | Liver Infusion Broth   | -1.343 | -0.666 |
| Firmicutes     | <i>Peribacillus castrilensis</i>       | NRRL No. B-41276                                | TGY                    | -1.832 | -0.955 |
| Firmicutes     | <i>Peribacillus frigiditolerans</i>    | NRRL No. BD-432                                 | TGY                    | -0.808 | -0.349 |
| Firmicutes     | <i>Peribacillus simplex</i>            | NRRL No. BD-267                                 | TGY                    | -2.190 | -1.167 |
| Firmicutes     | <i>Planococcus sierraensis</i>         | NRRL No. B-65582                                | R2A                    | -0.690 | -0.279 |
| Firmicutes     | <i>Priestia aryabhatai</i>             | NRRL No. BD-263                                 | TGY                    | 0.703  | 0.546  |
| Firmicutes     | <i>Priestia endophytica</i>            | NRRL No. BD-290                                 | TGY                    | -0.665 | -0.264 |
| Firmicutes     | <i>Rummeliibacillus stabekisii</i>     | NRRL No. B-51320                                | TSBY                   | -1.180 | -0.569 |
| Firmicutes     | <i>Sporosarcina globispora</i>         | NRRL No. B-3396                                 | TGY                    | -0.273 | -0.032 |
| Firmicutes     | <i>Staphylococcus sp.</i> HA57         | PMID:29556109                                   | R2A                    | -0.799 | -0.343 |
| Firmicutes     | <i>Sutcliffiella cohnii</i>            | NRRL No. B-14735                                | Alkaline Nutrient Agar | -1.104 | -0.524 |
| Firmicutes     | <i>Weissella confusa</i>               | NRRL No. B-1064                                 | Liver Infusion Broth   | -1.089 | -0.515 |
| Firmicutes     | <i>Weissella viridescens</i>           | NRRL No. B-1951                                 | Liver Infusion Broth   | -1.472 | -0.742 |
| Proteobacteria | <i>Acinetobacter baylyi</i> ADP1       | ATCC #33305                                     | BHI                    | -0.644 | -0.252 |
| Proteobacteria | <i>Agrobacterium tumefaciens</i> FACH  | Dong <i>et al.</i> 1992. <i>Phytopathology.</i> | TSBY                   | -0.305 | -0.051 |
| Proteobacteria | <i>Burkholderia thailandensis</i> E264 | PMID:16725056                                   | LB                     | 0.175  | 0.233  |
| Proteobacteria | <i>Erwinia caratovora</i> Ecc71        | PMID:9701816                                    | LB                     | -0.074 | 0.086  |
| Proteobacteria | <i>Escherichia coli</i> MG1655         | ATCC #47076                                     | LB                     | -1.006 | -0.466 |
| Proteobacteria | <i>Lysobacter enzymogenes</i> UASM495  | ATCC #29487                                     | TSBY                   | -0.109 | 0.065  |
| Proteobacteria | <i>Pseudomonas aeruginosa</i> PAO1     | PMID:10984043                                   | LB                     | -0.442 | -0.132 |
| Proteobacteria | <i>Serratia proteamaculans</i>         | PMID:26187596                                   | LB                     | -0.255 | -0.021 |
| Proteobacteria | <i>Xanthomonas maltophilia</i>         | ATCC #13637                                     | TSBY                   | -0.579 | -0.213 |
